# Supplementary material for: High-performance ternary polymer solar cells from a structurally similar polymer alloy
Source: Royal Society of Chemistry journal article supplement (doi:10.1039/c7ta02891a), 2017-01-01
Supplement: c7ta02891a1.pdf [file c7ta02891a1.pdf]

## Electronic Supplementary Information (ESI)

### High-Performance Ternary Polymer Solar Cells from a Structural Similar Polymer Alloy

Wenfei Shen, Weichao Chen,\* Dangqiang Zhu, Jidong Zhang, Xiaofeng Xu, Huanxiang Jiang, Ting Wang, Ergang Wang\* and Renqiang Yang\*

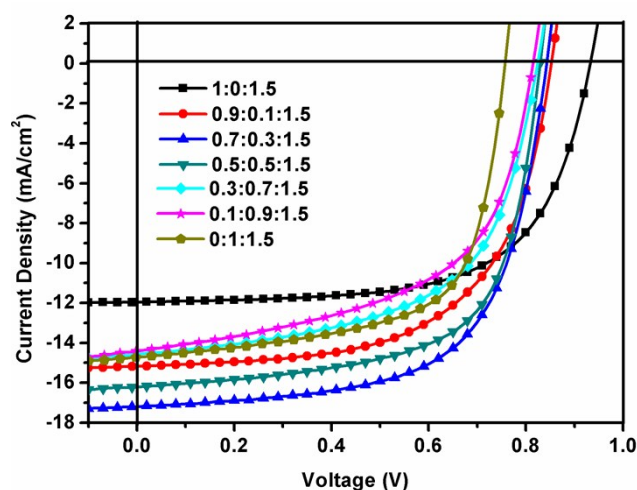

**Figure S1.**  $J$ - $V$  curves of the solar cells with different PBDTTPD:PBDTTT-C-T:PC<sub>71</sub>BM weight ratios.

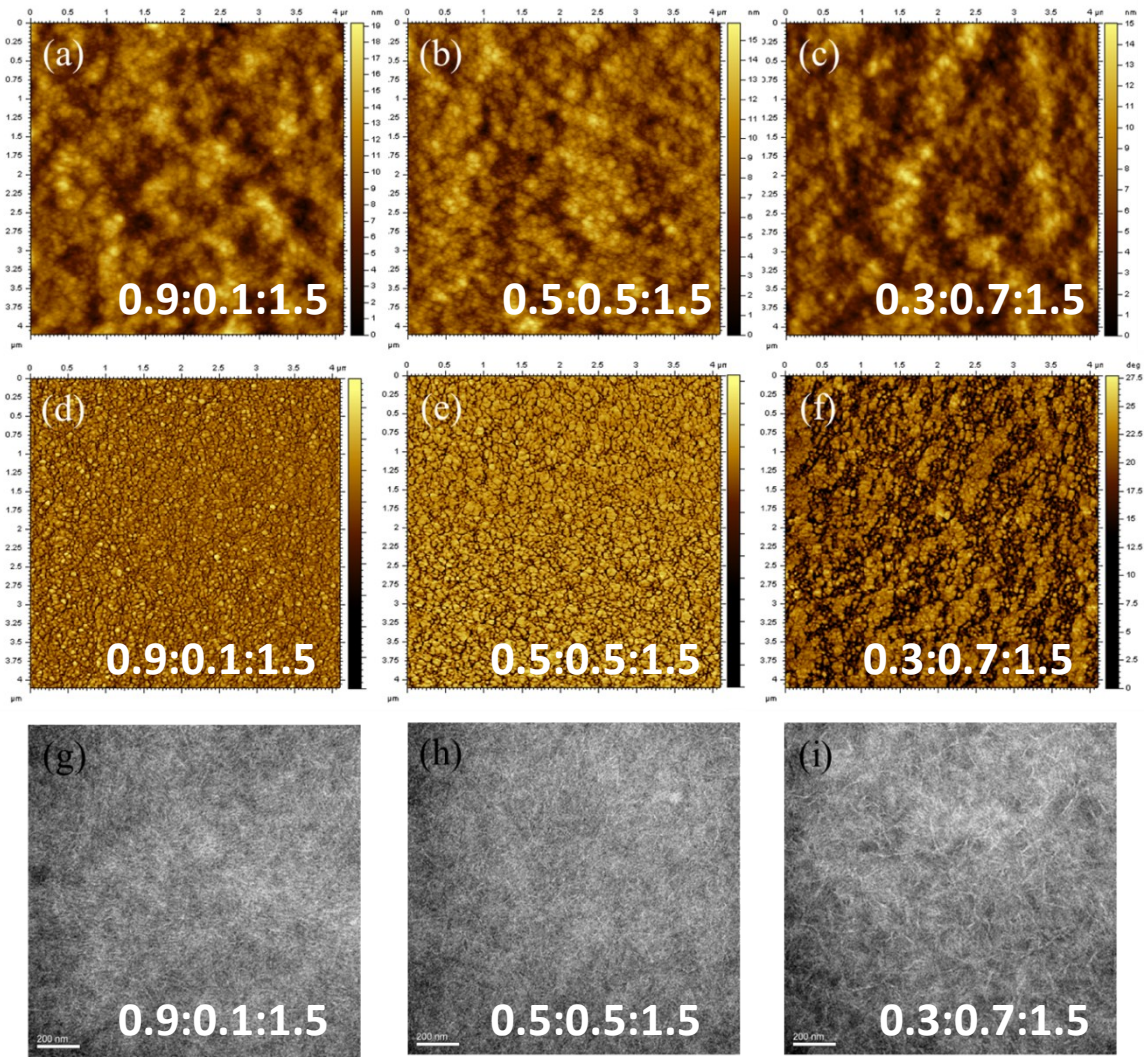

**Figure S2.** AFM height images of a) PBDTTPD: PBDTTT-C-T:PC<sub>71</sub>BM (0.9:0.1:1.5) blend film, b) PBDTTPD:PBDTTT-C-T: PC<sub>71</sub>BM (0.5:0.5:1.5) blend film and c) PBDTTPD: PBDTTT-C-T:PC<sub>71</sub>BM (0.3:0.7:1.5) blend film; d), e), f) are the corresponding phase images, respectively; g), h), i) are the corresponding TEM images, respectively.

### 1. UPS calculation.

From Figure 7a, the  $E_{\text{cutoff}}$  values of PBDTTPD film, PBDTTT-C-T film and the 7:3 blend film are 4.2 eV, 4.38 eV and 4.33 eV, respectively. And the  $E_{\text{onset}}$  values of PBDTTPD film, PBDTTT-C-T film and the 7:3 blend film are 1.15 eV, 0.7 eV and 0.88 eV, respectively. Hence, the ionization potential of PBDTTPD film, PBDTTT-C-T film and the 7:3 blend film (IPs is the absolute value of the HOMO energy level relative to the vacuum level) can be calculated according the equation  $\text{IP} = -(E_{\text{cutoff}} + E_{\text{onset}})$ .

## 2. Hole and electron mobility characterization.

The hole and electron carrier mobility of active layers in the ternary devices were investigated according to the trap-free space-charge-limited-current (SCLC) model. The devices with structures of ITO/PEDOT:PSS/active layer/Au for hole and ITO/ZnO/active layer/Ca/Al for electron were prepared. All these device fabrication processes were same to the normal OPVs devices as above other than the differences in electrodes.<sup>[1]</sup> The equation of the model is stated as:  $J_{SCLC} = (9/8) \epsilon_0 \epsilon_r \mu (V^2)/(L^3)$ , where  $J_{SCLC}$  is the current density,  $\epsilon_0$  is the dielectric constant of free space,  $\epsilon_r$  is the relative permittivity of the transport medium,  $\mu$  is the hole ( $\mu_h$ ) or electron ( $\mu_e$ ) mobility,  $V$  is the applied voltage and  $L$  is the thickness of the active layer.

### References

- [1] W. Chen, M. Xiao, L. Han, J. Zhang, H. Jiang, C. Gu, W. Shen, R. Yang, *ACS Appl. Mater. Interfaces* 2016, **8**, 19665.
